# Supplementary material
Source: PubMed Central journal article supplement (PMC5283595)
Supplement: EMBR-17-1785-s001.pdf [file EMBR-17-1785-s001.pdf]

## Expanded View Figures

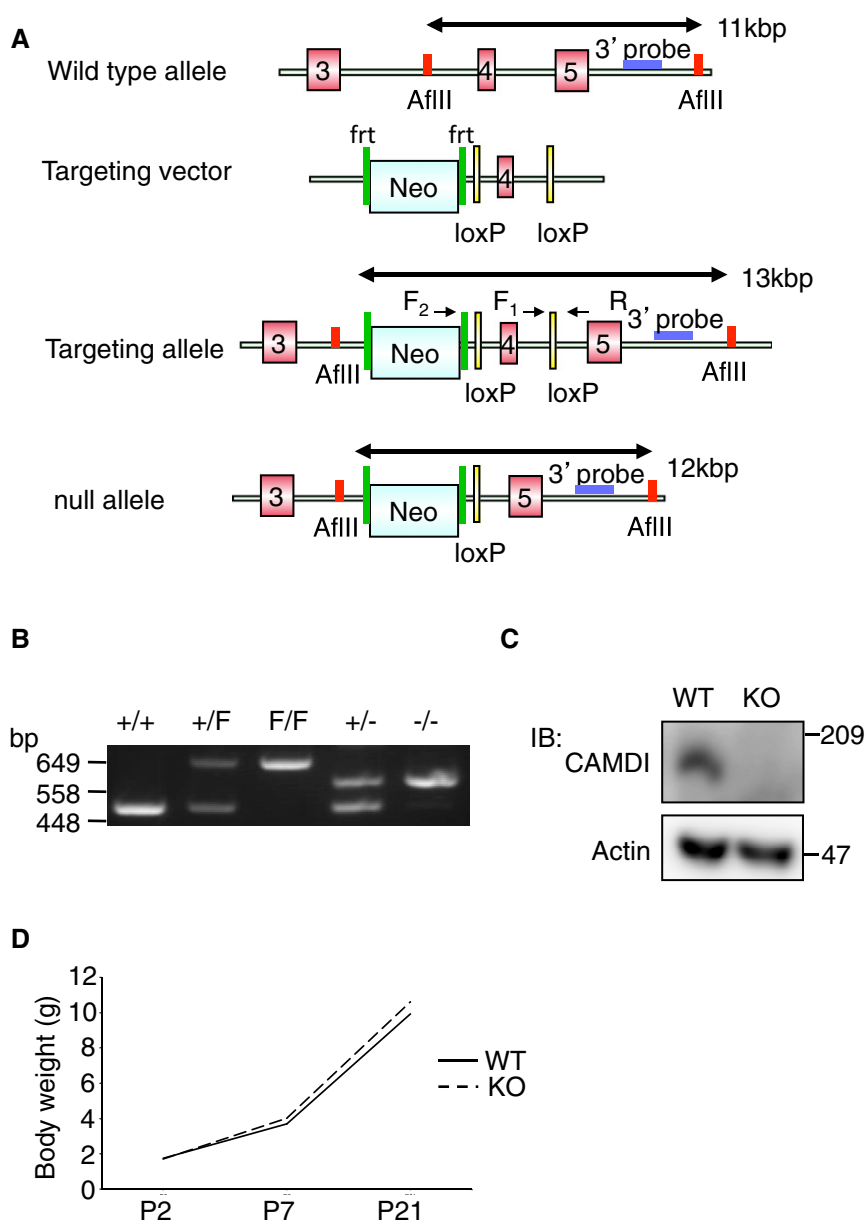

**Figure EV1. Generation of CAMDI-KO mice.**  
Related to Fig 1.

- A Targeting strategy for CAMDI-KO mice. The 3' probes are used for Southern blot analysis. F1, F2, and R mark the primers used for genomic PCR.
- B Genotypes of CAMDI mutant mice were determined by PCR on tail DNAs.
- C Western blot analysis of E16 mouse brain lysate probed with anti-CAMDI-specific antibody to demonstrate an absence of CAMDI protein by CAMDI KO.
- D Body weight analysis revealed normal body weight at birth and during juvenile age.  $n = 8$  mice for each genotype.

**Figure EV2. No significant difference in progenitor cell proliferation, cell fate, and callosal projection by CAMDI deletion.**

Related to Fig 1.

- A Abnormal distribution of Cux1-positive neurons in CAMDI-KO mice at P21. Expressions of Cux1 and CTIP2 in the somatosensory cortex were compared between P21 WT and CAMDI-KO mice. Scale bar, 20  $\mu$ m.
- B Quantification of the number of Cux1- and CTIP2-positive neurons of P21.  $n = 3$  for WT mice (Cux1: 2,309 cells, CTIP2: 4,421 cells) and  $n = 4$  for KO mice (Cux1: 2,324 cells, CTIP2: 4,393 cells). One-way ANOVA with Bonferroni's *post hoc* test. Data are presented as mean  $\pm$  SEM.
- C Quantification of the number of phospho-histone H3-positive cells at E16.  $n = 3$  mice/genotype (WT = 96 cells, KO = 150 cells). One-way ANOVA with Bonferroni's *post hoc* test. Data are presented as mean  $\pm$  SEM. Scale bar, 50  $\mu$ m.
- D Quantification of the number of TBR2-positive cells at E16.  $n = 3$  mice/genotype (WT = 316 cells, KO = 327 cells). One-way ANOVA with Bonferroni's *post hoc* test. Data are presented as mean  $\pm$  SEM. Scale bar, 100  $\mu$ m.
- E Quantification of the number of BrdU-positive cells at E18. BrdU injection was performed at E14.  $n = 3$  mice/genotype (WT = 1,953 cells, KO = 2,103 cells). One-way ANOVA with Bonferroni's *post hoc* test. Data are presented as mean  $\pm$  SEM. Scale bar, 100  $\mu$ m.
- F Coronal sections through the somatosensory cortex of P56 WT and CAMDI-KO mice were analyzed following *in utero* electroporation of EGFP plasmid at E14.5. Scale bar, 1 mm.
- G Quantification of the striatal intensity at P56.  $n = 3$  mice/genotype. \* $P < 0.05$ ; one-way ANOVA with Bonferroni's *post hoc* test. Data are presented as mean  $\pm$  SEM.
- H, I Quantification of the callosal intensity at P56 (H) and P21 (I).  $n = 3$  mice/genotype. One-way ANOVA with Bonferroni's *post hoc* test. Data are presented as mean  $\pm$  SEM.

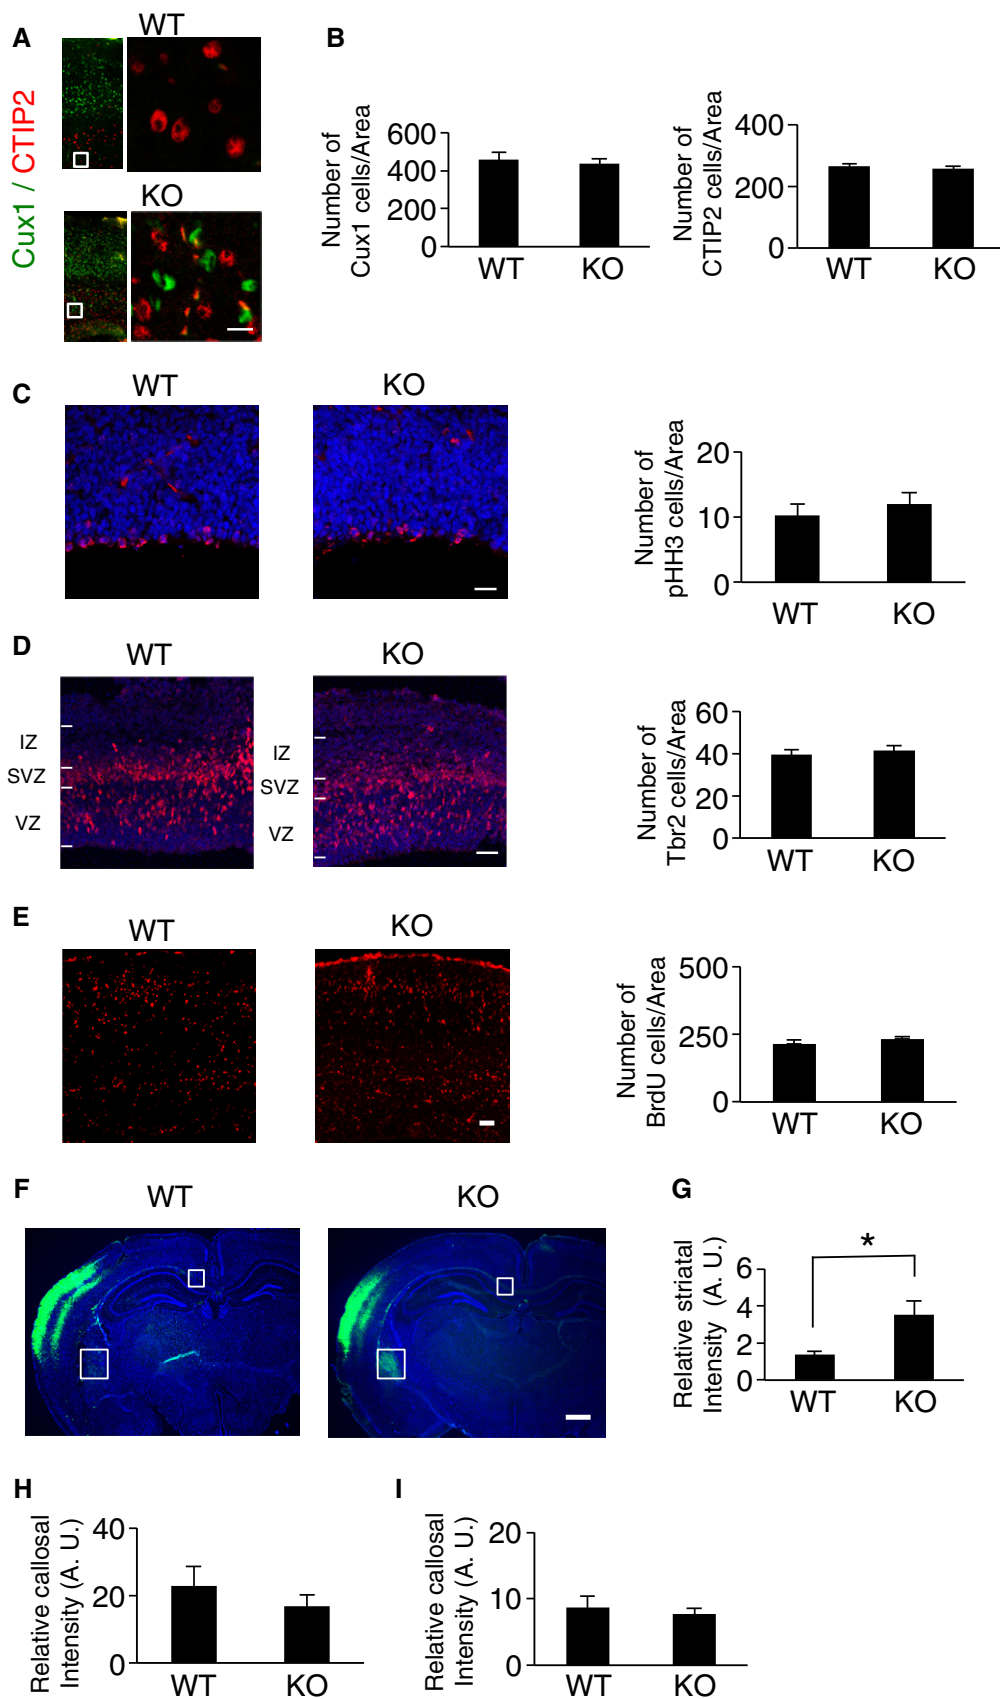

Figure EV2.

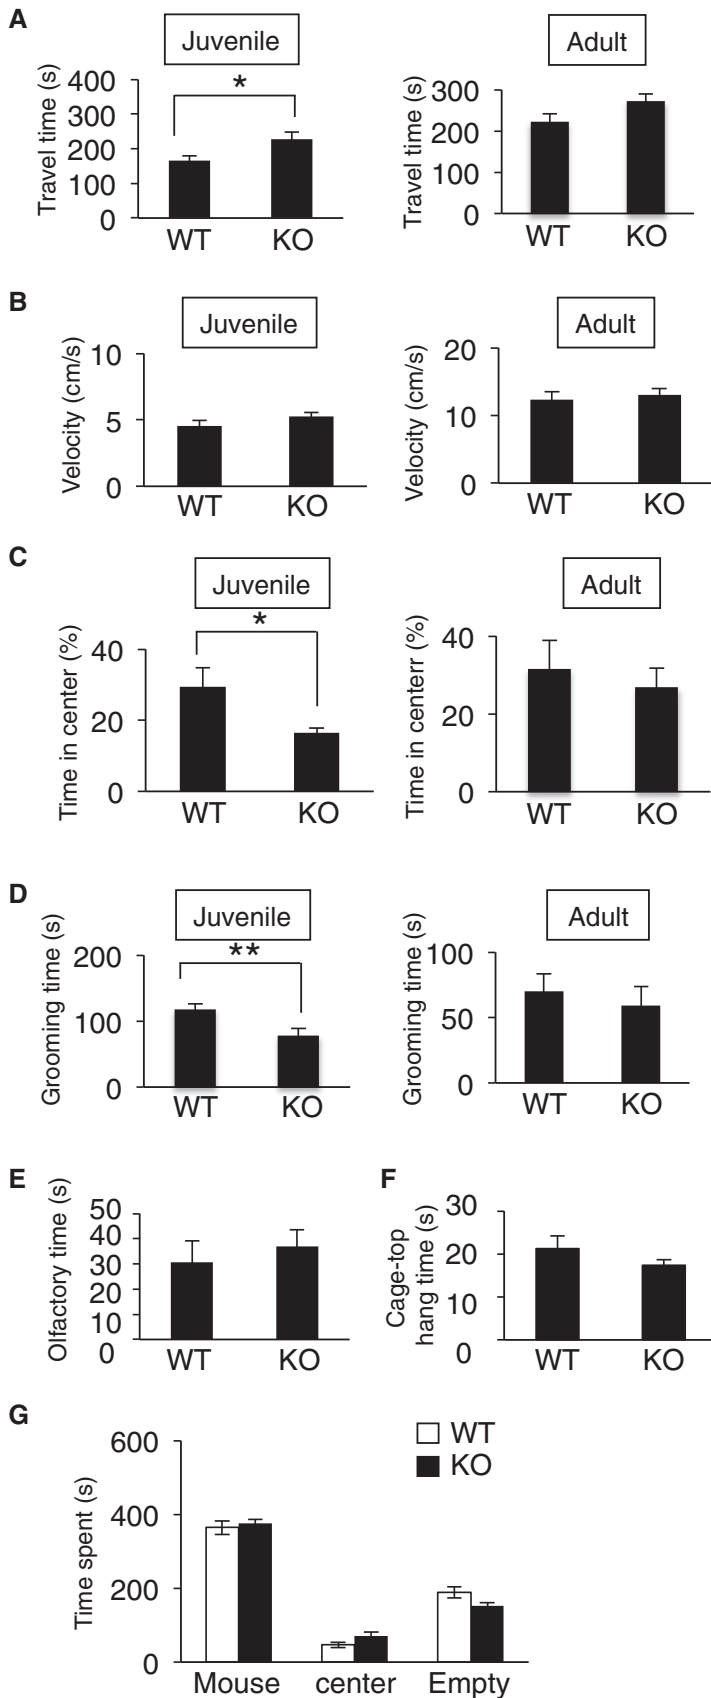

**Figure EV3. The behavioral differences between WT and CAMDI-KO mice at juvenile and adult stages.**

Related to Fig 2.

- A** Travel time on open-field test at juvenile and adult stages. For juvenile,  $n = 13$  for WT mice and  $n = 13$  for KO mice. For adult,  $n = 8$  for WT mice and  $n = 7$  for KO mice. \* $P < 0.05$ ; one-way ANOVA with Bonferroni's *post hoc* test (juvenile:  $F(1, 24) = 5.87$ , adult:  $F(1, 13) = 2.55$ ). Data are presented as mean  $\pm$  SEM.
- B** The velocity in the open-field test at juvenile and adult stages. For juvenile,  $n = 13$  for WT mice and  $n = 13$  for KO mice. For adult,  $n = 8$  for WT mice and  $n = 7$  for KO mice. One-way ANOVA with Bonferroni's *post hoc* test (juvenile:  $F(1, 24) = 1.74$ , adult:  $F(1, 13) = 0.17$ ). Data are presented as mean  $\pm$  SEM.
- C** Time in center (%) on open-field test at juvenile and adult stages. For juvenile,  $n = 13$  for WT mice and  $n = 13$  for KO mice. For adult,  $n = 8$  for WT mice and  $n = 7$  for KO mice. \* $P < 0.05$ ; one-way ANOVA with Bonferroni's *post hoc* test (juvenile:  $F(1, 24) = 5.75$ , adult:  $F(1, 13) = 0.63$ ). Data are presented as mean  $\pm$  SEM.
- D** Grooming time in open-field test at juvenile and adult stages. For juvenile,  $n = 13$  for WT mice and  $n = 13$  for KO mice. For adult,  $n = 8$  for WT mice and  $n = 7$  for KO mice. \*\* $P < 0.01$ ; one-way ANOVA with Bonferroni's *post hoc* test (juvenile:  $F(1, 24) = 7.84$ , adult:  $F(1, 13) = 0.31$ ). Data are presented as mean  $\pm$  SEM.
- E** Olfactory function test at adult.  $n = 13$  for WT mice and  $n = 21$  for KO mice. One-way ANOVA with Bonferroni's *post hoc* test ( $F(1, 32) = 0.21$ ). Data are presented as mean  $\pm$  SEM.
- F** Cage-top hang test at adult.  $n = 10$  for WT mice and  $n = 16$  for KO mice. One-way ANOVA with Bonferroni's *post hoc* test ( $F(1, 24) = 0.32$ ). Data are presented as mean  $\pm$  SEM.
- G** Three-chamber social interaction test at adult. Total time spent in each chamber.  $n = 19$  for WT mice and  $n = 20$  for KO mice. Two-way ANOVA followed by Scheffe's *post hoc* test (main effect of genotype  $F(1, 96) = 0.E+0$ , main effect of chamber  $F(2, 96) = 282$ , interaction  $F(2, 96) = 3.26$ ). Data are presented as mean  $\pm$  SEM.

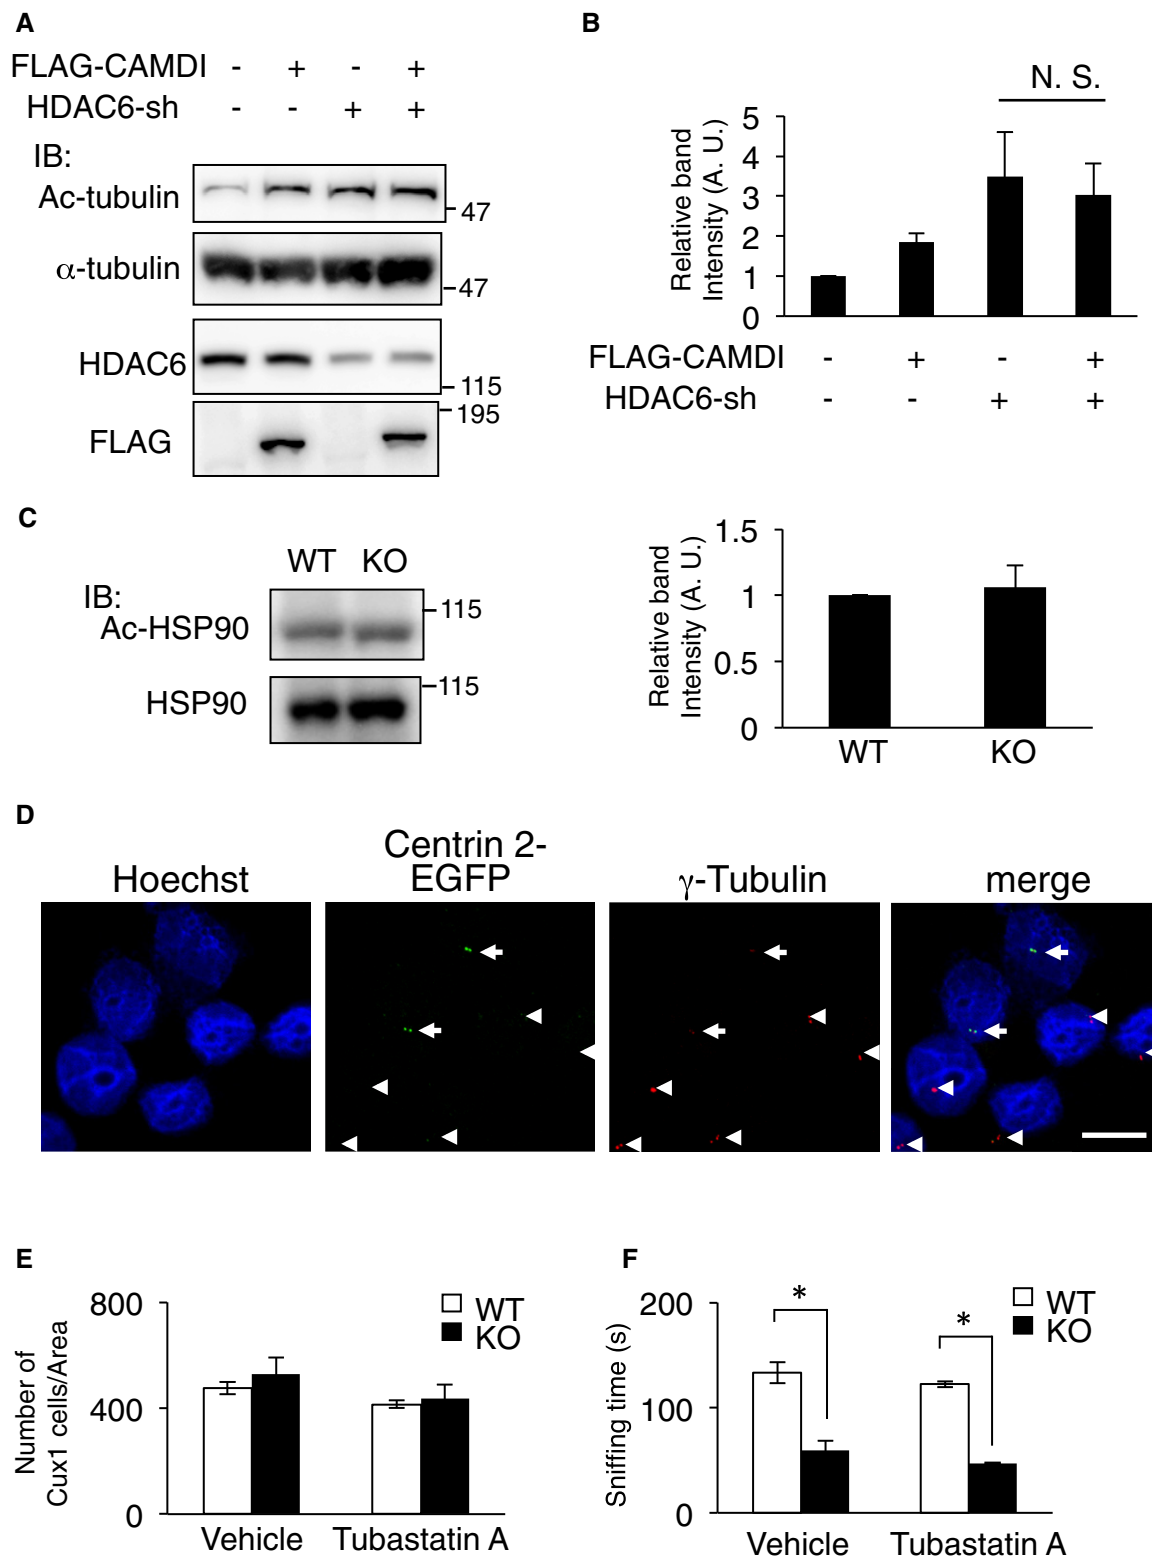

Figure EV4.

**Figure EV4. Effects of HDAC6 overexpression on the  $\gamma$ -tubulin at centrosome.**

Related to Figs 5–7.

- A, B CAMDI overexpression has no effect on tubulin acetylation in the condition of HDAC6 knockdown by shRNA. SH-SY5Y cells were transfected with indicated vectors, and IP and IB assays were performed using the indicated antibodies.  $n = 3$  independent experiments. N. S., not significant. Two-way ANOVA followed by Scheffe's *post hoc* test. Data are presented as mean  $\pm$  SEM.
- C No significant change in Ac-HSP90 level in CAMDI-KO cerebral cortex. Ac-HSP90 level was assessed by immunoblot analysis.  $n = 3$  independent experiments. One-way ANOVA followed with Bonferroni's *post hoc* test. Data are presented as mean  $\pm$  SEM.
- D HeLa cells were transfected with centrin 2-EGFP and HDAC6-HA and immunostained with anti-EGFP (green) and anti- $\gamma$ -tubulin antibodies (red). DNA was stained with Hoechst 33258. Arrow: HDAC6-HA and centrin 2-EGFP transfected cells. Arrowhead: non-transfected cells. Scale bar, 10  $\mu$ m.
- E Quantification of the number of Cux1-positive neurons at P2.  $n = 3$  mice/genotype (WT (vehicle) = 1,426 cells, KO (vehicle) = 2,116 cells, WT (Tubastatin A) = 1,245 cells, KO (Tubastatin A) = 1,311 cells). Two-way ANOVA followed by Scheffe's *post hoc* test. Data are presented as mean  $\pm$  SEM.
- F Three-chamber social interaction test. The time spent sniffing with stranger mouse.  $n = 8$  for WT (vehicle) mice,  $n = 6$  for KO (vehicle) mice,  $n = 5$  for WT (Tubastatin A) mice, and  $n = 3$  for KO (Tubastatin A) mice. \* $P < 0.05$ ; two-way ANOVA followed by Scheffe's *post hoc* test (main effect of genotype  $F(1, 18) = 11.11$ , main effect of drug  $F(1, 18) = 0.24$ , interaction  $F(1, 18) = 0.064$ ). Data are presented as mean  $\pm$  SEM.

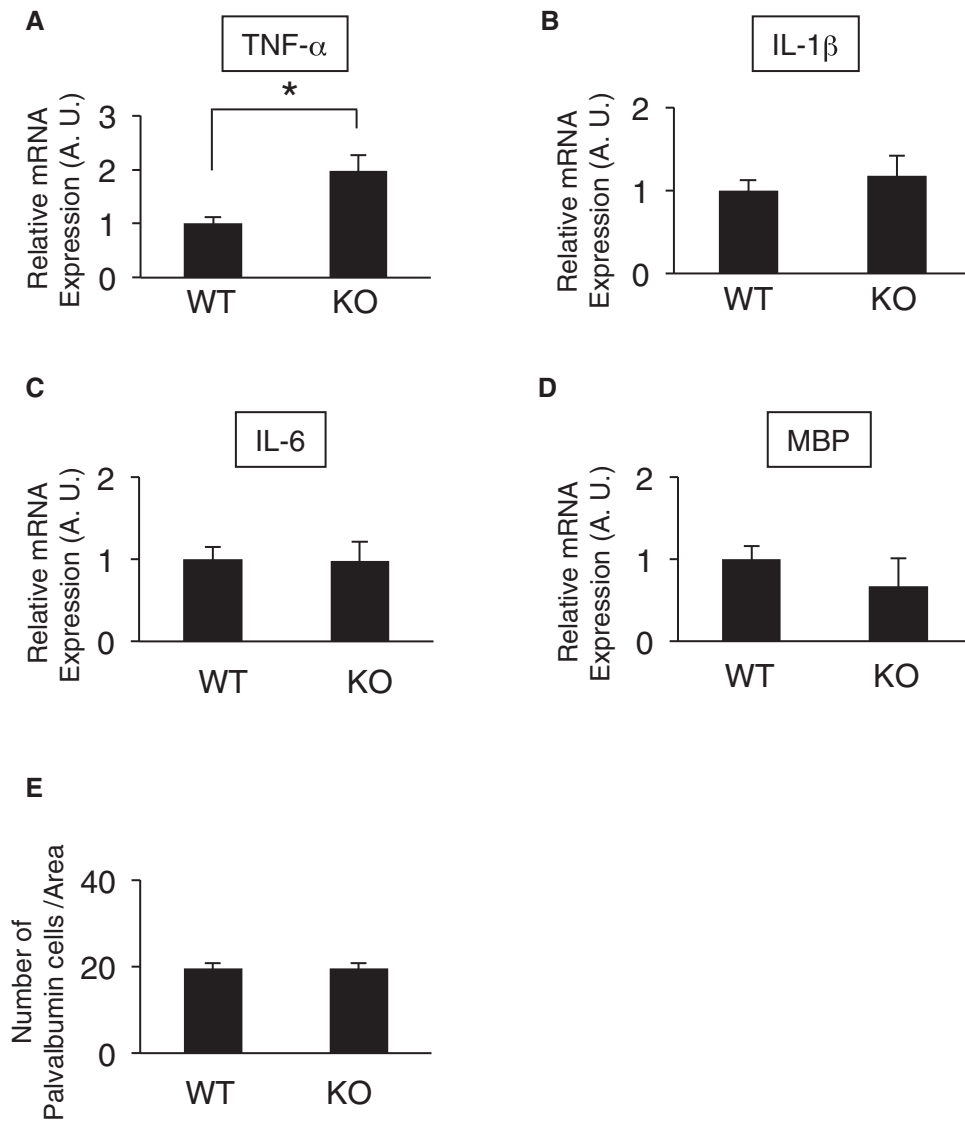

**Figure EV5. Analysis of biological alterations in CAMDI-KO brain relevant to psychiatric disorders.**

- A Real-time PCR quantification of the transcript for TNF- $\alpha$ .  $n = 3$  mice/genotype.  $*P < 0.05$ ; one-way ANOVA with Bonferroni's *post hoc* test. Data are presented as mean  $\pm$  SEM.
- B Real-time PCR quantification of the transcript for IL-1 $\beta$ .  $n = 3$  mice/genotype. One-way ANOVA with Bonferroni's *post hoc* test. Data are presented as mean  $\pm$  SEM.
- C Real-time PCR quantification of the transcript for IL-6.  $n = 3$  mice/genotype. One-way ANOVA with Bonferroni's *post hoc* test. Data are presented as mean  $\pm$  SEM.
- D Real-time PCR quantification of the transcript for MBP (myelin basic protein).  $n = 3$  mice/genotype. One-way ANOVA with Bonferroni's *post hoc* test. Data are presented as mean  $\pm$  SEM.
- E Quantification of the number of Parvalbumin-positive neurons. Note the abnormal distribution of neurons in deep cortical layers of CAMDI-KO mice.  $n = 3$  mice/genotype (WT = 816 cells, KO = 438 cells). One-way ANOVA with Bonferroni's *post hoc* test. Data are presented as mean  $\pm$  SEM.
